# Supplementary material for: The Impact of Health Plan Physician-Tiering on Access to Care
Source: Springer Nature journal article supplement (doi:10.1007/s11606-010-1607-3), 2010-12-22

**APPENDIX**

**A. Sensitivity Analyses.**

Because health plans use a variety of methods to identify physicians who should receive a lower copayment, in addition to our primary analysis of travel times presented in the manuscript, we conducted three sensitivity analyses that we believe reflect the range of methods used by health plans. All of our sensitivity analyses use the same physician profiles that were used in the primary analysis presented in the manuscript. The sensitivity analyses use different criteria for designating physicians who would qualify for the lower copayment in tiered health plans. To make our methods clearer, we'll refer to a 3x3 matrix included in Figure 1 below.

To review, our primary analysis designated physicians as high-value if they provided care that was average quality and lower cost, higher quality and lower cost, or higher quality and average cost. This corresponds to boxes 2, 3, or 6 in the 3x3 matrix in Figure 1.

Our first sensitivity analysis is based on our understanding of the approach used by United health plan. Our understanding is that they first screen out lower quality physicians and then screen out higher cost physicians. This leaves physicians in boxes 2, 3, 5, and 6 in the "high-value" category. Patients pay a lower copayment to see these physicians.

Our second sensitivity analysis is similar to the approach we understand is used by Aetna. It takes into consideration geographic distribution of the population and physicians. In this analysis, as in our primary analysis, physicians were considered "high-value" if they were in boxes 2, 3, or 6. Unlike in our primary analysis, physicians in rural census blocks also were included in the high-value category regardless of their profile for cost or quality. We also considered including physicians in a Health Provider Shortage Area (HPSA) as designated by the federal government, but we felt the rural / urban designation was the most relevant to our analysis.

In our third sensitivity analysis, physicians were considered high-value only if they were in box 3 - if they provided care that was both higher quality and lower cost than their peers.

Below are the results of our analyses, including the number of physicians who would receive the lower copayment (Table 1), the population-weighted average statewide travel times (Table 2), and sociodemographic analyses for each specialty (Tables 3-6). Generally our results are associated closely with the number of physicians in the high-value tier. In sensitivity analyses #1 and #2, which, like our primary analysis, were based on approaches used by health plans, the travel times to designated physicians seem unlikely to be prohibitive. In fact, sensitivity analysis #1 demonstrated that including around half of the physicians in the high-value tier would limit the increase in average travel times to high-value PCPs, obstetrician/gynecologist, and cardiologists to less than 1 minute. Sensitivity analysis #3 represents a method that is unlikely to be used by health plans, as an unreasonably small number of physicians qualified for receiving the lower copay. In this analysis there is a significant increase travel time, though surprisingly the average travel time to the nearest high-value PCP was less than 15 minutes and to the nearest specialist was well less than 1 hour. An analysis which included more physicians as eligible for the lower copay would likely only decrease the average travel times and improve geographic access.

Our sociodemographic analyses again reflect that having more high-value physicians decreases the travel time to the nearest high-value physician. Notably, sensitivity analysis #1 - which included 2-3 times as many physicians in the high-value tier as our primary analysis and sensitivity analysis #2 - yielded shorter average travel times for rural populations than sensitivity analysis #2, in which rural physicians were included in the high-value category.

**B. Geographic distribution of the population and physicians.**

Figures 2-5 are maps of Massachusetts which show the correlation between physician location and population density. They also demonstrate that high-value physicians in our primary analysis shared a similar geographic distribution as the overall physician population.

**Figure 1:** Physicians labeled as high-value in our primary analysis and sensitivity analyses (shading indicates high-value)

Primary analysis in paper

|  | **Higher Cost** | **Average Cost** | **Lower Cost** |
| --- | --- | --- | --- |
| **Higher Quality** | 1 | 2 | 3 |
| **Average Quality** | 4 | 5 | 6 |
| **Lower Quality** | 7 | 8 | 9 |

Sensitivity Analysis #1

|  | **Higher Cost** | **Average Cost** | **Lower Cost** |
| --- | --- | --- | --- |
| **Higher Quality** | 1 | 2 | 3 |
| **Average Quality** | 4 | 5 | 6 |
| **Lower Quality** | 7 | 8 | 9 |

Sensitivity Analysis #2

|  | **Higher Cost** | **Average Cost** | **Lower Cost** |
| --- | --- | --- | --- |
| **Higher Quality** | 1 | 2* | 3* |
| **Average Quality** | 4 | 5 | 6* |
| **Lower Quality** | 7 | 8 | 9 |

*** High-value tier also includes all rural physicians**

|  | **Higher Cost** | **Average Cost** | **Lower Cost** |
| --- | --- | --- | --- |
| **Higher Quality** | 1 | 2 | 3 |
| **Average Quality** | 4 | 5 | 6 |
| **Lower Quality** | 7 | 8 | 9 |

**Sensitivity Analysis #3**

**Table 1.** Physicians included in primary and sensitivity analyses

| **Specialty** | **All Physicians** | **Number of high value physicians (% of all physicians)** | | | |
| --- | --- | --- | --- | --- | --- |
| **Primary analysis** | **Sensitivity analysis #1 (similar to United)** | **Sensitivity analysis #2 (similar to Aetna)** | **Sensitivity analysis #3 (higher quality and lower cost)** |
| **PCP** | 3677 (100%) | 768 (20.9%)* | 1970 (53.6%)* | 901 (24.5%)* | 115 (3.1%)* |
| **OB/GYN** | 846 (100%) | 225 (26.6%)* | 498 (58.9%)* | 236 (27.9%)* | 29 (3.4%)* |
| **Cardiologists** | 673 (100%) | 69 (10.3%)* | 335 (49.8%)* | 78 (11.6%)* | 3 (0.4%)* |
| **General Surgery** | 516 (100%) | 31 (6.0%)* | 110 (21.3%)* | 40 (7.8%)* | 2 (0.4%)* |

*Percent of all physicians in that specialty in Massachusetts

**Table 2.** Population-weighted statewide mean travel times for primary and sensitivity analyses

| **Specialty** | **All Physicians** | **Only High Value Physicians** | | | |
| --- | --- | --- | --- | --- | --- |
| **Primary analysis** | **Sensitivity analysis #1 (similar to United)** | **Sensitivity analysis #2 (similar to Aetna)** | **Sensitivity analysis #3 (higher quality and lower cost)** |
| **PCP** | 2.8 | 4.8 | 3.2 | 4.4 | 10.9 |
| **OB/GYN** | 6.0 | 7.2 | 6.5 | 7.3 | 16.2 |
| **Cardiologists** | 7.0 | 12.5 | 7.9 | 12.1 | 37.7 |
| **General Surgery** | 6.6 | 14.8 | 9.4 | 14.3 | 43.9 |

**Table 3. Population-weighted statewide mean travel times for primary and sensitivity analyses to PCPs for different sociodemographic groups**

| **Population** | | **All Physicians** | **Only High Value Physicians** | | | |
| --- | --- | --- | --- | --- | --- | --- |
| **Primary analysis** | **Sensitivity analysis #1 (similar to United)** | **Sensitivity analysis #2 (similar to Aetna)** | **Sensitivity analysis #3 (higher quality and lower cost)** |
|  | **All adults** | 2.8 | 4.8 | 3.1 | 4.3 | 10.8 |
| **Race** | **White** | 3.0 | 5.1 | 3.3 | 4.6 | 11.5 |
| **Black** | 1.6 | 3.7 | 1.8 | 3.5 | 6.8 |
| **Hispanic** | 1.6 | 2.8 | 1.8 | 2.7 | 7.2 |
| **Other** | 1.9 | 3.2 | 2.2 | 2.9 | 6.9 |
| **Income** | **< Poverty line** | 2.0 | 3.8 | 2.3 | 3.5 | 9.3 |
| **> 95th percentile** | 3.1 | 5.2 | 3.5 | 4.7 | 10.1 |
| **Residence Location** | **Urban** | 2.5 | 4.1 | 2.7 | 3.9 | 9.4 |
| **Rural** | 6.9 | 12.8 | 7.8 | 9.4 | 26.8 |
| **Disability** | **Non-disabled** | 2.9 | 4.9 | 3.2 | 4.4 | 10.8 |
| **Disabled** | 2.5 | 4.6 | 2.8 | 4.1 | 10.7 |

**Table 4. Population-weighted statewide mean travel times for primary and sensitivity analyses to obstetrician/gynecologists for different sociodemographic groups. Only adult women were included in this analysis.**

| **Population** | | **All Physicians** | **Only High Value Physicians** | | | |
| --- | --- | --- | --- | --- | --- | --- |
| **Primary analysis** | **Sensitivity analysis #1 (similar to United)** | **Sensitivity analysis #2 (similar to Aetna)** | **Sensitivity analysis #3 (higher quality and lower cost)** |
|  | **All adult women** | 6.0 | 7.2 | 6.3 | 7.1 | 16.1 |
| **Race** | **White** | 6.4 | 7.6 | 6.7 | 7.5 | 17.0 |
| **Black** | 4.4 | 5.9 | 4.8 | 5.9 | 10.4 |
| **Hispanic** | 3.4 | 4.9 | 3.8 | 4.8 | 11.3 |
| **Other** | 3.9 | 5.1 | 4.2 | 5.1 | 11.2 |
| **Income** | **< Poverty line** | 4.7 | 6.0 | 5.1 | 5.9 | 13.8 |
| **> 95th percentile** | 6.4 | 7.5 | 6.7 | 7.4 | 15.6 |
| **Residence Location** | **Urban** | 5.3 | 6.5 | 5.6 | 6.4 | 14.9 |
| **Rural** | 14.1 | 15.8 | 14.6 | 15.2 | 30.0 |
| **Disability** | **Non-disabled** | 6.1 | 7.3 | 6.4 | 7.2 | 16.1 |
| **Disabled** | 5.6 | 6.8 | 5.9 | 6.7 | 15.8 |

**Table 5. Population-weighted statewide mean travel times for primary and sensitivity analyses to cardiologists for different sociodemographic groups.**

| **Population** | | **All Physicians** | **Only High Value Physicians** | | | |
| --- | --- | --- | --- | --- | --- | --- |
| **Primary analysis** | **Sensitivity analysis #1 (similar to United)** | **Sensitivity analysis #2 (similar to Aetna)** | **Sensitivity analysis #3 (higher quality and lower cost)** |
|  | **All adults** | 7.0 | 12.4 | 7.9 | 12.0 | 37.4 |
| **Race** | **White** | 7.4 | 13.3 | 8.3 | 12.8 | 39.3 |
| **Black** | 5.1 | 8.2 | 6.3 | 8.3 | 25.9 |
| **Hispanic** | 3.9 | 7.5 | 4.7 | 7.5 | 30.6 |
| **Other** | 4.6 | 8.2 | 5.4 | 8.1 | 26.5 |
| **Income** | **< Poverty line** | 5.5 | 10.4 | 6.3 | 10.1 | 35.4 |
| **> 95th percentile** | 7.3 | 11.9 | 8.3 | 11.6 | 31.2 |
| **Residence Location** | **Urban** | 6.1 | 11.2 | 6.9 | 10.9 | 35.0 |
| **Rural** | 17.0 | 26.5 | 18.7 | 24.4 | 64.4 |
| **Disability** | **Non-disabled** | 7.1 | 12.4 | 8.0 | 12.0 | 37.2 |
| **Disabled** | 6.6 | 12.4 | 7.5 | 12.0 | 38.4 |

**Table 6. Population-weighted statewide mean travel times for primary and sensitivity analyses to general surgeons for different sociodemographic groups.**

| **Population** | | **All Physicians** | **Only High Value Physicians** | | | |
| --- | --- | --- | --- | --- | --- | --- |
| **Primary analysis** | **Sensitivity analysis #1 (similar to United)** | **Sensitivity analysis #2 (similar to Aetna)** | **Sensitivity analysis #3 (higher quality and lower cost)** |
|  | **All adults** | 6.6 | 14.8 | 9.3 | 14.2 | 43.5 |
| **Race** | **White** | 7.1 | 15.8 | 9.9 | 15.1 | 45.3 |
| **Black** | 5.0 | 8.5 | 6.5 | 8.5 | 31.9 |
| **Hispanic** | 3.7 | 10.2 | 5.3 | 10.2 | 37.1 |
| **Other** | 4.4 | 9.5 | 6.3 | 9.4 | 32.9 |
| **Income** | **< Poverty line** | 5.1 | 12.3 | 7.4 | 11.8 | 41.0 |
| **> 95th percentile** | 7.4 | 14.5 | 9.6 | 14.2 | 38.7 |
| **Residence Location** | **Urban** | 6.0 | 13.5 | 8.2 | 13.0 | 41.0 |
| **Rural** | 14.4 | 29.5 | 20.9 | 26.6 | 71.9 |
| **Disability** | **Non-disabled** | 6.7 | 14.9 | 9.4 | 14.3 | 43.4 |
| **Disabled** | 6.2 | 14.4 | 8.8 | 13.7 | 44.0 |

**
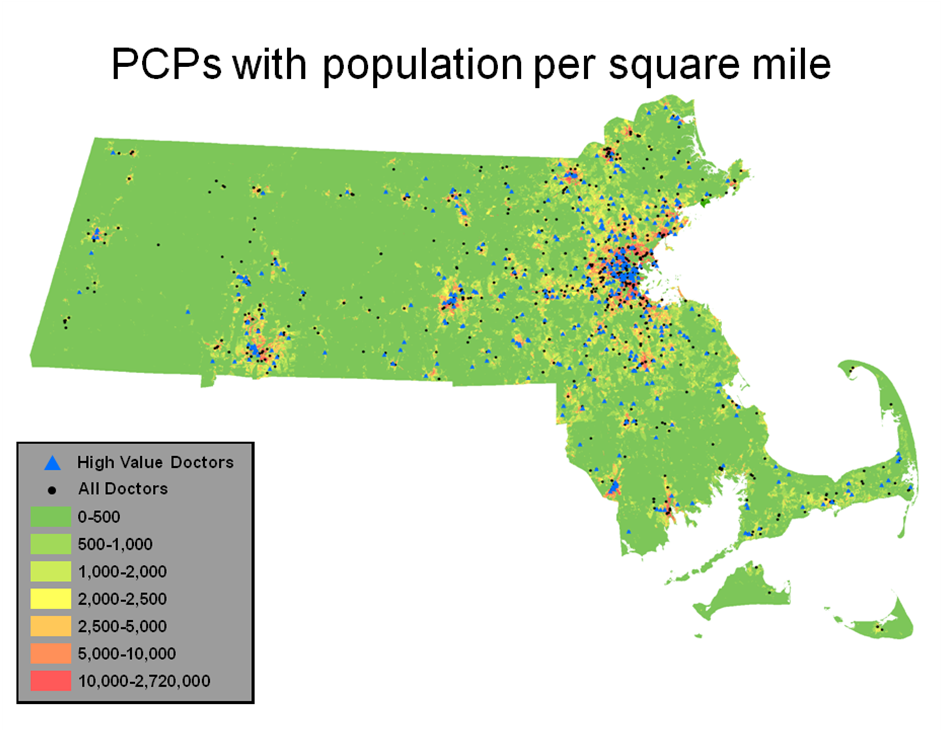
**

**
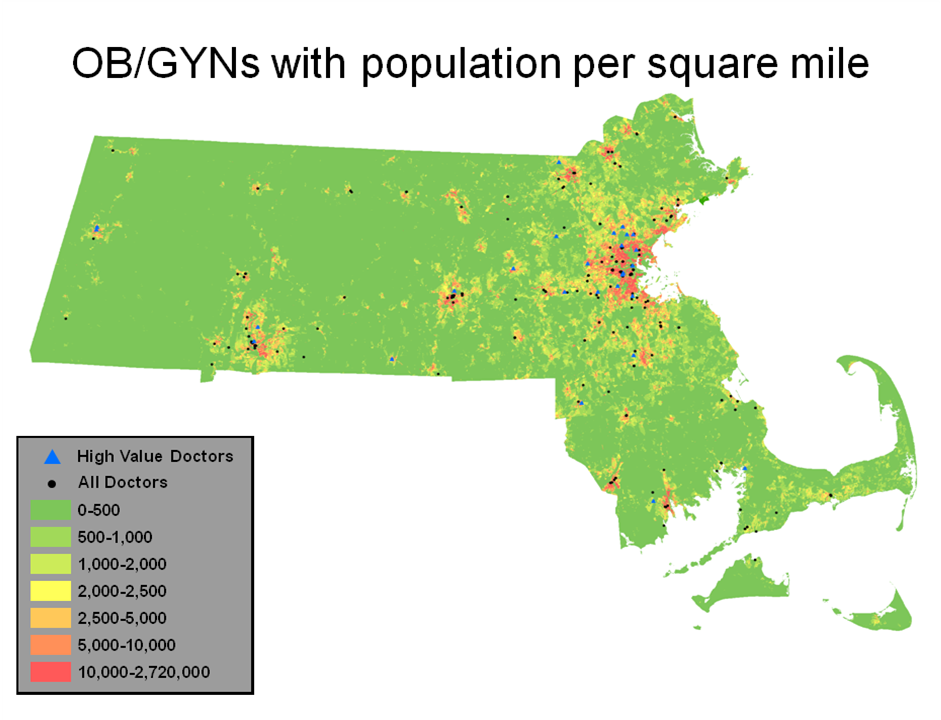
** **
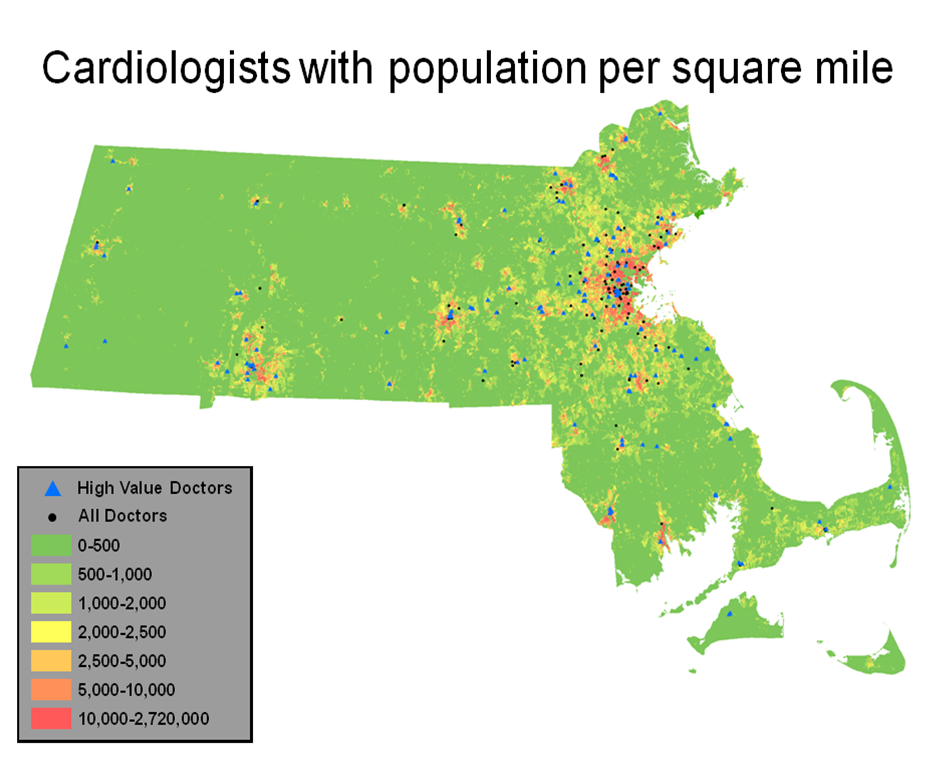
**


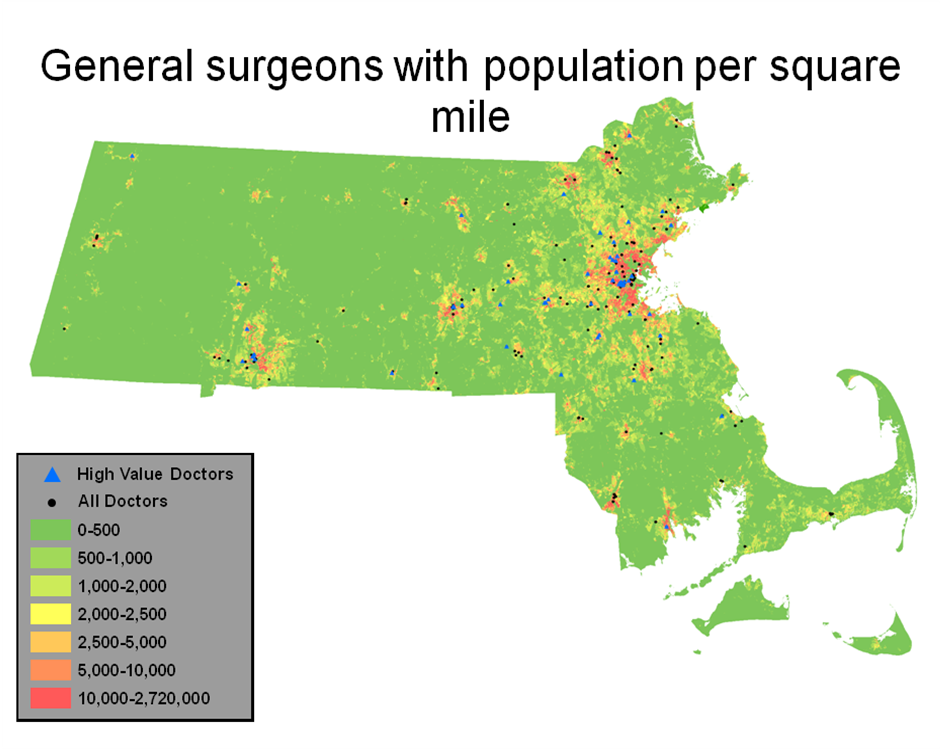

Supplement: MOESM1 [file 11606_2010_1607_MOESM1_ESM.doc]
